# Supplementary material for: Continuous activation of Li2MnO3 component upon cycling in Li1.167Ni0.233Co0.100Mn0.467Mo0.033O2 cathode material for lithium ion batteries
Source: Royal Society of Chemistry journal article supplement (doi:10.1039/c2ta00309k), 2012-12-21
Supplement: c2ta00309k.pdf [file c2ta00309k.pdf]

## Supplementary Information

Continuous activation of  $\text{Li}_2\text{MnO}_3$  component upon cycling in  
 $\text{Li}_{1.167}\text{Ni}_{0.233}\text{Co}_{0.100}\text{Mn}_{0.467}\text{Mo}_{0.033}\text{O}_2$  cathode material for lithium ion  
batteries

Seung-Ho Yu, Taeho Yoon, Junyoung Mun, Sangjin Park, Yoon-Sok Kang, Jin-Hwan Park,  
Seung M. Oh\* and Yung-Eun Sung\*

| Cycle number | Charge mode                                                                       | Discharge mode                     |
|--------------|-----------------------------------------------------------------------------------|------------------------------------|
| 1st          | 23 mA g <sup>-1</sup> (CC)<br>& 4.55 V (CV, cut-off at 2.3 mA g <sup>-1</sup> )   | 23 mA g <sup>-1</sup> (CC) to 2 V  |
| 2nd          | 115 mA g <sup>-1</sup> (CC)<br>& 4.55 V (CV, cut-off at 2.3 mA g <sup>-1</sup> )  | 46 mA g <sup>-1</sup> (CC) to 2 V  |
| 3rd          | 115 mA g <sup>-1</sup> (CC)<br>& 4.55 V (CV, cut-off at 11.5 mA g <sup>-1</sup> ) | 23 mA g <sup>-1</sup> (CC) to 2 V  |
| 4th          | 115 mA g <sup>-1</sup> (CC)<br>& 4.55 V (CV, cut-off at 11.5 mA g <sup>-1</sup> ) | 230 mA g <sup>-1</sup> (CC) to 2 V |

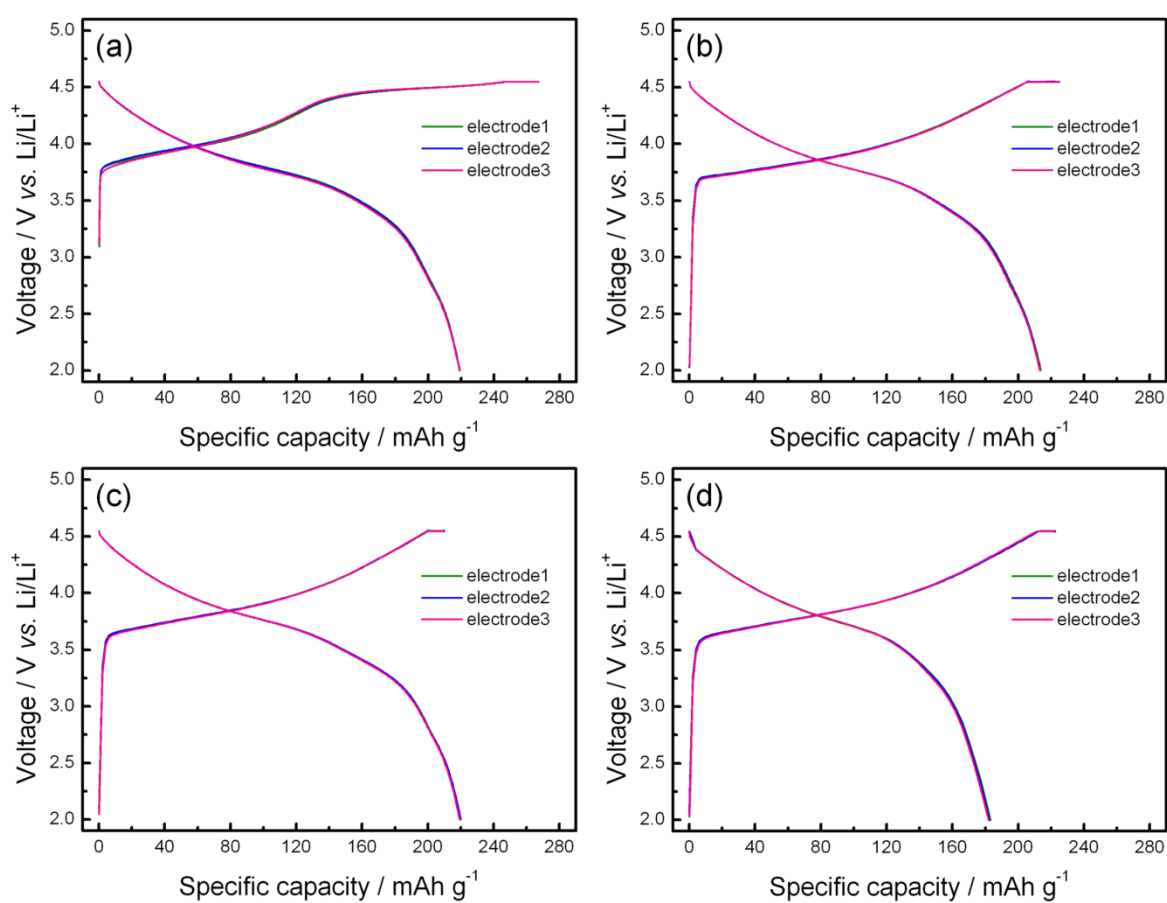

**Fig. S1** Voltage profiles of  $\text{Li}_{1.167}\text{Ni}_{0.233}\text{Co}_{0.100}\text{Mn}_{0.465}\text{Mo}_{0.033}\text{O}_2$  from three electrodes: (a) 1st cycle, (b) 2nd cycle, (c) 3rd cycle, (d) 4th cycle. The conditions for charge and discharge processes during 4 cycles are shown in following table (CC : constant current, CV : constant voltage). The other conditions such as composition of electrode, electrolyte and operation temperature are identical with those in manuscript.

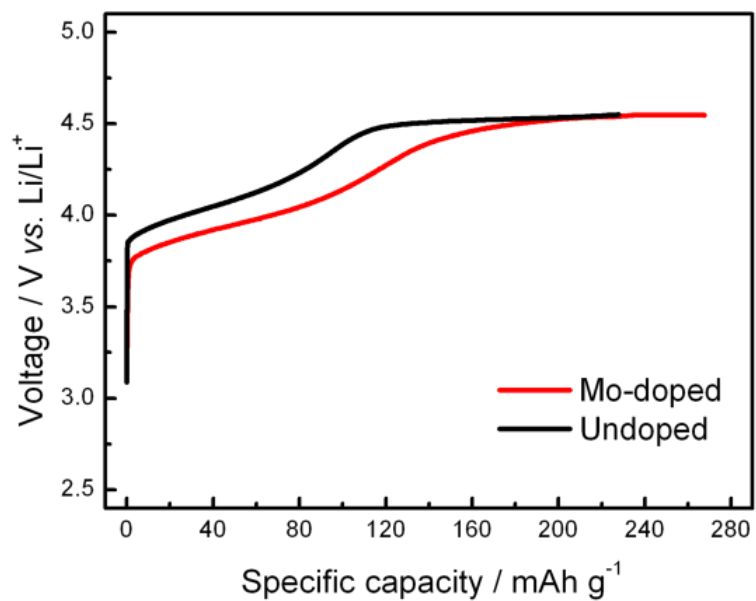

**Fig. S2** The initial charge curves of Mo-doped and un-doped samples.

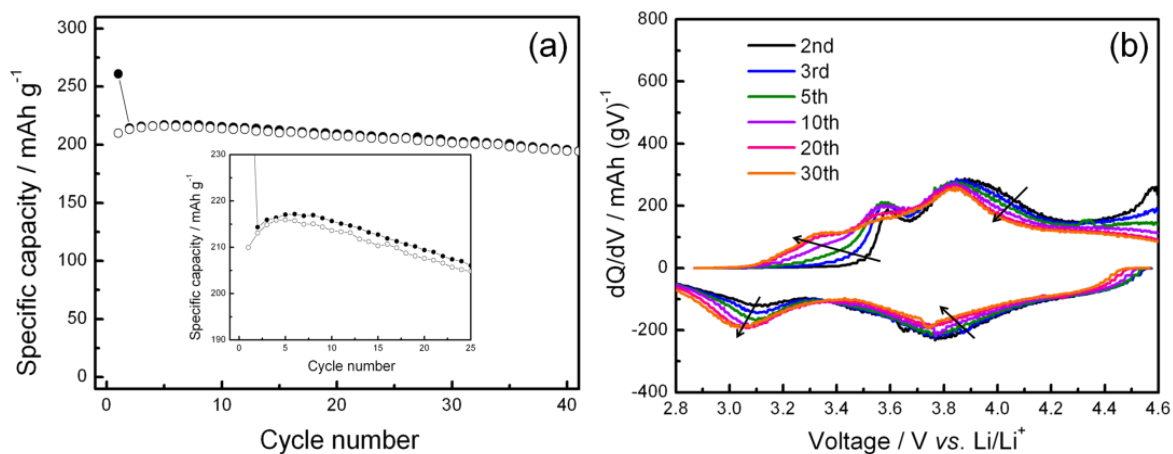

**Fig. S3** (a) Cycle performance of un-doped sample between 2.8–4.6 V at 0.2 C rate with only CC mode. Inset shows the enlarged cycle performance for detailed specific capacities. (b) The corresponding differential capacity plots.
